# Supplementary material
Source: ML conference proceedings conference paper supplement (https://openreview.net/forum?id=S9Ilqhz7hAK)
Supplement: supplementary_material [file attachment]

ssh://lingyang@10.209.201.64:22/home/lingyang/anaconda3/envs/torch1.2_cuda10.0/bin/python3.6 -u /home/lingyang/CODE/ai-adversarial-detection/dnn_invariant/test_cnn_config.py

Loading model from ./mdls/CNN4Invariant.mdl

torch.Size([12000, 392])

/home/lingyang/anaconda3/envs/torch1.2_cuda10.0/lib/python3.6/site-packages/sklearn/preprocessing/_encoders.py:373: DeprecationWarning: Passing 'n_values' is deprecated in version 0.20 and will be removed in 0.22. You can use the 'categories' keyword instead. 'n_values=n' corresponds to 'categories=[range(n)] * n_features'.

warnings.warn(msg, DeprecationWarning)

/home/lingyang/anaconda3/envs/torch1.2_cuda10.0/lib/python3.6/site-packages/sklearn/preprocessing/_encoders.py:451: DeprecationWarning: The 'categorical_features' keyword is deprecated in version 0.20 and will be removed in 0.22. You can use the ColumnTransformer instead.

"use the ColumnTransformer instead.", DeprecationWarning)

====> idx = 0

Anchor: 89 = 0 AND 109 = 0 AND 325 = 1 AND 222 = 1

exp contained by idx data!

coverage_abs: 223 coverage_rel: 0.01858 precision: 1.00

====> idx = 1

Anchor: 90 = 0 AND 105 = 0 AND 296 = 1 AND 354 = 1 AND 232 = 1 AND 321 = 1

exp contained by idx data!

coverage_abs: 492 coverage_rel: 0.04100 precision: 0.99

====> idx = 2

Anchor: 201 = 1 AND 299 = 1 AND 5 = 1 AND 390 = 1 AND 241 = 0

exp contained by idx data!

coverage_abs: 347 coverage_rel: 0.02892 precision: 0.99

====> idx = 3

Anchor: 83 = 0 AND 208 = 0 AND 100 = 1 AND 128 = 0

exp contained by idx data!

coverage_abs: 27 coverage_rel: 0.00225 precision: 1.00

====> idx = 4

Anchor: 277 = 1 AND 9 = 0 AND 116 = 0 AND 38 = 0

exp contained by idx data!

coverage_abs: 234 coverage_rel: 0.01950 precision: 0.99

====> idx = 5

Anchor: 80 = 0 AND 299 = 1 AND 5 = 1 AND 38 = 0 AND 252 = 0

exp contained by idx data!

coverage_abs: 210 coverage_rel: 0.01750 precision: 0.99

====> idx = 6

Anchor: 55 = 0 AND 296 = 1 AND 26 = 1 AND 38 = 0 AND 354 = 1 AND 345 = 0

exp contained by idx data!

coverage_abs: 96 coverage_rel: 0.00800 precision: 0.98

====> idx = 7

Anchor: 94 = 0 AND 299 = 1 AND 5 = 1 AND 181 = 1 AND 295 = 0

exp contained by idx data!

coverage_abs: 239 coverage_rel: 0.01992 precision: 0.98

====> idx = 8

Anchor: 75 = 0 AND 346 = 0 AND 56 = 0 AND 4 = 1 AND 344 = 0 AND 361 = 1

exp contained by idx data!

coverage_abs: 98 coverage_rel: 0.00817 precision: 0.97

====> idx = 9

Anchor: 285 = 1 AND 347 = 0 AND 296 = 1

exp contained by idx data!

coverage_abs: 294 coverage_rel: 0.02450 precision: 1.00

====> idx = 10

Anchor: 263 = 1 AND 9 = 0 AND 380 = 1 AND 296 = 1 AND 199 = 1 AND 252 = 1

exp contained by idx data!

coverage_abs: 243 coverage_rel: 0.02025 precision: 1.00

ssh://lingyang@10.209.201.64:22/home/lingyang/anaconda3/envs/torch1.2_cuda10.0/bin/python3.6 -u /home/lingyang/CODE/ai-adversarial-detection/dnn_invariant/test_cnn_config.py

Loading model from ./mdls/CNN4Invariant.mdl

torch.Size([12000, 196])

/home/lingyang/anaconda3/envs/torch1.2_cuda10.0/lib/python3.6/site-packages/sklearn/preprocessing/_encoders.py:373: DeprecationWarning: Passing 'n_values' is deprecated in version 0.20 and will be removed in 0.22. You can use the 'categories' keyword instead. 'n_values=n' corresponds to 'categories=[range(n)] * n_features'.

warnings.warn(msg, DeprecationWarning)

/home/lingyang/anaconda3/envs/torch1.2_cuda10.0/lib/python3.6/site-packages/sklearn/preprocessing/_encoders.py:451: DeprecationWarning: The 'categorical_features' keyword is deprecated in version 0.20 and will be removed in 0.22. You can use the ColumnTransformer instead.

"use the ColumnTransformer instead.", DeprecationWarning)

====> idx = 0

Anchor: 57 = 0 AND 157 = 1 AND 48 = 1

exp contained by idx data!

coverage_abs: 864 coverage_rel: 0.07200 precision: 0.99

====> idx = 1

Anchor: 56 = 0 AND 52 = 1 AND 69 = 0 AND 72 = 1 AND 59 = 0 AND 28 = 0

exp contained by idx data!

coverage_abs: 216 coverage_rel: 0.01800 precision: 1.00

====> idx = 2

Anchor: 57 = 0 AND 52 = 1 AND 185 = 1 AND 12 = 1 AND 140 = 1

exp contained by idx data!

coverage_abs: 480 coverage_rel: 0.04000 precision: 0.98

====> idx = 3

Anchor: 148 = 0 AND 157 = 1 AND 23 = 1

exp contained by idx data!

coverage_abs: 417 coverage_rel: 0.03475 precision: 1.00

====> idx = 4

Anchor: 84 = 0 AND 157 = 1 AND 129 = 1

exp contained by idx data!

coverage_abs: 979 coverage_rel: 0.08158 precision: 0.99

====> idx = 5

Anchor: 57 = 0 AND 52 = 1 AND 171 = 1 AND 59 = 0 AND 143 = 0 AND 95 = 0 AND 115 = 0

exp contained by idx data!

coverage_abs: 452 coverage_rel: 0.03767 precision: 0.97

====> idx = 6

Anchor: 3 = 0 AND 178 = 1 AND 135 = 0 AND 188 = 0 AND 24 = 0 AND 38 = 0 AND 11 = 1

exp contained by idx data!

coverage_abs: 303 coverage_rel: 0.02525 precision: 0.92

====> idx = 7

Anchor: 70 = 0 AND 157 = 1 AND 171 = 1

exp contained by idx data!

coverage_abs: 1677 coverage_rel: 0.13975 precision: 0.99

====> idx = 8

Anchor: 57 = 0 AND 69 = 0 AND 115 = 0 AND 108 = 1 AND 130 = 1 AND 188 = 0

exp contained by idx data!

coverage_abs: 383 coverage_rel: 0.03192 precision: 0.97

====> idx = 9

Anchor: 63 = 0 AND 185 = 1 AND 108 = 1 AND 20 = 1 AND 141 = 0

exp contained by idx data!

coverage_abs: 184 coverage_rel: 0.01533 precision: 0.99

====> idx = 10

Anchor: 84 = 0 AND 185 = 1 AND 17 = 0 AND 12 = 1 AND 112 = 0

exp contained by idx data!

coverage_abs: 276 coverage_rel: 0.02300 precision: 0.97

ssh://lingyang@10.209.201.64:22/home/lingyang/anaconda3/envs/torch1.2_cuda10.0/bin/python3.6 -u /home/lingyang/CODE/ai-adversarial-detection/dnn_invariant/test_cnn_config.py

Loading model from ./mdls/CNN4Invariant.mdl

torch.Size([12000, 36])

/home/lingyang/anaconda3/envs/torch1.2_cuda10.0/lib/python3.6/site-packages/sklearn/preprocessing/_encoders.py:373: DeprecationWarning: Passing 'n_values' is deprecated in version 0.20 and will be removed in 0.22. You can use the 'categories' keyword instead. 'n_values=n' corresponds to 'categories=[range(n)] * n_features'.

warnings.warn(msg, DeprecationWarning)

/home/lingyang/anaconda3/envs/torch1.2_cuda10.0/lib/python3.6/site-packages/sklearn/preprocessing/_encoders.py:451: DeprecationWarning: The 'categorical_features' keyword is deprecated in version 0.20 and will be removed in 0.22. You can use the ColumnTransformer instead.

"use the ColumnTransformer instead.", DeprecationWarning)

====> idx = 0

Anchor: 1 = 0 AND 20 = 0 AND 12 = 0 AND 19 = 1 AND 13 = 1

exp contained by idx data!

coverage_abs: 2449 coverage_rel: 0.20408 precision: 1.00

====> idx = 1

Anchor: 1 = 0 AND 20 = 0 AND 19 = 1 AND 34 = 0

exp contained by idx data!

coverage_abs: 657 coverage_rel: 0.05475 precision: 0.98

====> idx = 2

Anchor: 2 = 0 AND 20 = 0 AND 16 = 0 AND 22 = 1 AND 1 = 0 AND 14 = 1 AND 21 = 0 AND 4 = 0 AND 29 = 0 AND 31 = 1 AND 24 = 0 AND 18 = 0 AND 23 = 1 AND 13 = 1 AND 32 = 0 AND 0 = 0 AND 26 = 1 AND 7 = 0 AND 33 = 0 AND 35 = 0 AND 10 = 1 AND 34 = 1 AND 9 = 1 AND 15 = 1

exp contained by idx data!

coverage_abs: 95 coverage_rel: 0.00792 precision: 1.00

====> idx = 3

Anchor: 2 = 0 AND 20 = 0 AND 34 = 0

exp contained by idx data!

coverage_abs: 848 coverage_rel: 0.07067 precision: 0.96

====> idx = 4

Anchor: 1 = 0 AND 20 = 0 AND 8 = 1

exp contained by idx data!

coverage_abs: 827 coverage_rel: 0.06892 precision: 0.99

====> idx = 5

Anchor: 2 = 0 AND 22 = 0 AND 12 = 1 AND 33 = 0 AND 15 = 0 AND 11 = 1

exp contained by idx data!

coverage_abs: 3662 coverage_rel: 0.30517 precision: 0.05

====> idx = 6

Anchor: 2 = 0 AND 12 = 0 AND 19 = 1 AND 25 = 1

exp contained by idx data!

coverage_abs: 1992 coverage_rel: 0.16600 precision: 1.00

====> idx = 7

Anchor: 2 = 0 AND 12 = 0 AND 20 = 0 AND 22 = 1

exp contained by idx data!

coverage_abs: 2931 coverage_rel: 0.24425 precision: 0.99

====> idx = 8

Anchor: 1 = 0 AND 0 = 0 AND 4 = 0 AND 22 = 1 AND 3 = 1 AND 16 = 0 AND 32 = 0 AND 14 = 1 AND 2 = 0 AND 31 = 1 AND 21 = 0 AND 23 = 1 AND 18 = 0 AND 13 = 1 AND 24 = 0 AND 29 = 0 AND 26 = 1 AND 27 = 1 AND 5 = 0 AND 17 = 1

exp contained by idx data!

coverage_abs: 183 coverage_rel: 0.01525 precision: 0.97

====> idx = 9

Anchor: 1 = 0 AND 5 = 1

exp contained by idx data!

coverage_abs: 719 coverage_rel: 0.05992 precision: 1.00

====> idx = 10

Anchor: 1 = 0 AND 12 = 0 AND 22 = 1 AND 19 = 1

exp contained by idx data!

coverage_abs: 3264 coverage_rel: 0.27200 precision: 1.00
